# Supplementary material for: Further Insight into the Manganese(II) 2,2′-Bipyridine-1,1′-dioxide Homoleptic Complex: Single-Crystal X-ray Structure Determination of the Perchlorate Salt and DFT Calculations
Source: MDPI journal article supplement (doi:10.3390/cryst14050422), 2024-04-29

## checkCIF/PLATON report

Structure factors have been supplied for datablock(s) CCCDC\_2260010, \_CCDC\_2260009

THIS REPORT IS FOR GUIDANCE ONLY. IF USED AS PART OF A REVIEW PROCEDURE FOR PUBLICATION, IT SHOULD NOT REPLACE THE EXPERTISE OF AN EXPERIENCED CRYSTALLOGRAPHIC REFEREE.

No syntax errors found.      CIF dictionary      Interpreting this report

### Datablock: \_CCDC\_2260009

---

|                        |                                           |                                                            |
|------------------------|-------------------------------------------|------------------------------------------------------------|
| Bond precision:        | C-C = 0.0040 Å                            | Wavelength=0.71073                                         |
| Cell:                  | a=21.266(2)<br>alpha=90                   | b=19.1361(16)<br>beta=90.517(3)<br>c=25.447(2)<br>gamma=90 |
| Temperature:           | 100 K                                     |                                                            |
|                        | Calculated                                | Reported                                                   |
| Volume                 | 10355.2(15)                               | 10355.0(16)                                                |
| Space group            | P 21/n                                    | P 21/n                                                     |
| Hall group             | -P 2yn                                    | -P 2yn                                                     |
| Moiety formula         | 3(C30 H24 Mn N6 O6), 6(Cl O4), 3(H2 O), O | 3(C30 H24 Mn N6 O6), 6(Cl O4), 4(H2 O)                     |
| Sum formula            | C90 H78 Cl6 Mn3 N18 O46                   | C90 H80 Cl6 Mn3 N18 O46                                    |
| Mr                     | 2525.22                                   | 2527.24                                                    |
| Dx, g cm <sup>-3</sup> | 1.620                                     | 1.621                                                      |
| Z                      | 4                                         | 4                                                          |
| Mu (mm <sup>-1</sup> ) | 0.620                                     | 0.620                                                      |
| F000                   | 5156.0                                    | 5164.0                                                     |
| F000'                  | 5166.32                                   |                                                            |
| h, k, lmax             | 28, 25, 34                                | 28, 25, 33                                                 |
| Nref                   | 26029                                     | 25850                                                      |
| Tmin, Tmax             | 0.911, 0.943                              | 0.630, 0.714                                               |
| Tmin'                  | 0.876                                     |                                                            |

Correction method= # Reported T Limits: Tmin=0.630 Tmax=0.714  
AbsCorr = MULTI-SCAN

Data completeness= 0.993      Theta(max)= 28.407

R(reflections)= 0.0531( 22753)

wR2(reflections)=  
0.1421( 25850)

S = 1.069

Npar= 1483

---

The following ALERTS were generated. Each ALERT has the format

**test-name\_ALERT\_alert-type\_alert-level.**

Click on the hyperlinks for more details of the test.

---

### Alert level B

|                   |                                          |                                   |            |
|-------------------|------------------------------------------|-----------------------------------|------------|
| PLAT214_ALERT_2_B | Atom O162                                | (Anion/Solvent) ADP max/min Ratio | 5.2 prolat |
| PLAT306_ALERT_2_B | Isolated Oxygen Atom (H-atoms Missing ?) | .....                             | O4W Check  |

---

### Alert level C

|                   |                                                   |                |              |
|-------------------|---------------------------------------------------|----------------|--------------|
| PLAT041_ALERT_1_C | Calc. and Reported SumFormula                     | Strings Differ | Please Check |
|                   | Calc: C90 H78 Cl6 Mn3 N18 O46                     |                |              |
|                   | Rep.: C90 H80 Cl6 Mn3 N18 O46                     |                |              |
| PLAT042_ALERT_1_C | Calc. and Reported MoietyFormula                  | Strings Differ | Please Check |
|                   | Calc: 3(C30 H24 Mn N6 O6), 6(Cl O4), 3(H2 O), O   |                |              |
|                   | Rep.: 3(C30 H24 Mn N6 O6), 6(Cl O4), 4(H2 O)      |                |              |
| PLAT068_ALERT_1_C | Reported F000 Differs from Calcd (or Missing)...  |                | Please Check |
| PLAT244_ALERT_4_C | Low 'Solvent' Ueq as Compared to Neighbors of     |                | Cl2 Check    |
| PLAT244_ALERT_4_C | Low 'Solvent' Ueq as Compared to Neighbors of     |                | Cl4 Check    |
| PLAT244_ALERT_4_C | Low 'Solvent' Ueq as Compared to Neighbors of     |                | Cl5 Check    |
| PLAT260_ALERT_2_C | Large Average Ueq of Residue Including            | Cl6            | 0.119 Check  |
| PLAT906_ALERT_3_C | Large K Value in the Analysis of Variance .....   |                | 3.021 Check  |
| PLAT910_ALERT_3_C | Missing # of FCF Reflection(s) Below Theta(Min).  |                | 7 Note       |
|                   | 1 1 0, -1 0 1, -1 1 1, 0 1 1, 1 0 1, 1 1 1,       |                |              |
|                   | 0 0 2,                                            |                |              |
| PLAT911_ALERT_3_C | Missing FCF Refl Between Thmin & STh/L=           | 0.600          | 22 Report    |
|                   | 0 2 0, 0 8 0, 2 1 0, 10 9 0, -1 9 1, 2 18 1,      |                |              |
|                   | -11 0 3, -8 9 3, 0 8 3, 10 1 4, 10 9 4, 0 9 5,    |                |              |
|                   | -10 1 6, -10 8 6, 0 17 7, -10 1 8, 11 8 8, 0 8 9, |                |              |
|                   | 11 0 9, -1 8 12, -9 0 21, 0 8 27,                 |                |              |
| PLAT934_ALERT_3_C | Number of (Iobs-Icalc)/Sigma(W) > 10 Outliers ..  |                | 1 Check      |
|                   | -10 1 12,                                         |                |              |
| PLAT971_ALERT_2_C | Check Calcd Resid. Dens. 2.75Ang From O164        |                | 1.54 eA-3    |
| PLAT975_ALERT_2_C | Check Calcd Resid. Dens. 1.03Ang From O4W         | .              | 0.54 eA-3    |
| PLAT976_ALERT_2_C | Check Calcd Resid. Dens. 0.99Ang From O111        | .              | -0.69 eA-3   |
| PLAT976_ALERT_2_C | Check Calcd Resid. Dens. 1.02Ang From O131        | .              | -0.67 eA-3   |
| PLAT976_ALERT_2_C | Check Calcd Resid. Dens. 0.67Ang From O112        | .              | -0.59 eA-3   |

---

### Alert level G

FORMU01\_ALERT\_2\_G There is a discrepancy between the atom counts in the  
\_chemical\_formula\_sum and the formula from the \_atom\_site\* data.  
Atom count from \_chemical\_formula\_sum: C90 H80 Cl6 Mn3 N18 O46  
Atom count from the \_atom\_site data: C90 H78 Cl6 Mn3 N18 O46

CELLZ01\_ALERT\_1\_G Difference between formula and atom\_site contents detected.

CELLZ01\_ALERT\_1\_G WARNING: H atoms missing from atom site list. Is this intentional?  
From the CIF: \_cell\_formula\_units\_Z 4  
From the CIF: \_chemical\_formula\_sum C90 H80 Cl6 Mn3 N18 O46  
TEST: Compare cell contents of formula and atom\_site data

| atom | Z*formula | cif sites | diff |
|------|-----------|-----------|------|
| C    | 360.00    | 360.00    | 0.00 |
| H    | 320.00    | 312.00    | 8.00 |
| Cl   | 24.00     | 24.00     | 0.00 |

|                                                                    |                                                  |          |          |                  |
|--------------------------------------------------------------------|--------------------------------------------------|----------|----------|------------------|
| Mn                                                                 | 12.00                                            | 12.00    | 0.00     |                  |
| N                                                                  | 72.00                                            | 72.00    | 0.00     |                  |
| O                                                                  | 184.00                                           | 184.00   | 0.00     |                  |
| PLAT007_ALERT_5_G Number of Unrefined Donor-H Atoms .....          |                                                  |          |          | 6 Report         |
| H11W                                                               | H12W                                             | H21W     | H22W     | H31W H32W        |
| PLAT083_ALERT_2_G SHELXL Second Parameter in WGHT Unusually Large  |                                                  |          |          | 24.34 Why ?      |
| PLAT093_ALERT_1_G No s.u.'s on H-positions, Refinement Reported as |                                                  |          |          | mixed Check      |
| PLAT232_ALERT_2_G                                                  | Hirshfeld Test Diff (M-X)                        | Mn2      | --O41    | . 5.3 s.u.       |
| PLAT232_ALERT_2_G                                                  | Hirshfeld Test Diff (M-X)                        | Mn3      | --O72    | . 6.4 s.u.       |
| PLAT244_ALERT_4_G                                                  | Low 'Solvent' Ueq as Compared to Neighbors of    |          |          | C11 Check        |
| PLAT244_ALERT_4_G                                                  | Low 'Solvent' Ueq as Compared to Neighbors of    |          |          | C13 Check        |
| PLAT244_ALERT_4_G                                                  | Low 'Solvent' Ueq as Compared to Neighbors of    |          |          | C16 Check        |
| PLAT432_ALERT_2_G                                                  | Short Inter X...Y Contact                        | O162     | ..C910   | . 2.98 Ang.      |
|                                                                    |                                                  | x,y,z =  |          | 1_555 Check      |
| PLAT790_ALERT_4_G Centre of Gravity not Within Unit Cell: Resd. #  |                                                  |          |          | 9 Note           |
|                                                                    | C1                                               | O4       |          |                  |
| PLAT794_ALERT_5_G                                                  | Tentative Bond Valency for Mn1                   | (II)     | .        | 2.26 Info        |
| PLAT794_ALERT_5_G                                                  | Tentative Bond Valency for Mn2                   | (II)     | .        | 2.28 Info        |
| PLAT794_ALERT_5_G                                                  | Tentative Bond Valency for Mn3                   | (II)     | .        | 2.32 Info        |
| PLAT912_ALERT_4_G                                                  | Missing # of FCF Reflections Above STh/L=        | 0.600    |          | 143 Note         |
| PLAT933_ALERT_2_G                                                  | Number of HKL-OMIT Records in Embedded .res File |          |          | 17 Note          |
|                                                                    | 0 2 0,                                           | 2 1 0,   | -10 1 6, | 11 0 9, -11 0 3, |
|                                                                    | -1 8 12,                                         | -10 8 6, | 11 8 8,  | -10 1 8, 10 1 4, |
|                                                                    | -9 0 21,                                         | 0 8 27,  | 10 9 0,  | 0 9 5, 0 8 3,    |
| PLAT969_ALERT_5_G The 'Henn et al.' R-Factor-gap value .....       |                                                  |          |          | 6.22 Note        |
| Predicted wR2: Based on SigI**2 2.28 or SHELX Weight 13.69         |                                                  |          |          |                  |
| PLAT978_ALERT_2_G Number C-C Bonds with Positive Residual Density. |                                                  |          |          | 1 Info           |

---

0 **ALERT level A** = Most likely a serious problem - resolve or explain  
 2 **ALERT level B** = A potentially serious problem, consider carefully  
 16 **ALERT level C** = Check. Ensure it is not caused by an omission or oversight  
 20 **ALERT level G** = General information/check it is not something unexpected

6 ALERT type 1 CIF construction/syntax error, inconsistent or missing data  
 15 ALERT type 2 Indicator that the structure model may be wrong or deficient  
 4 ALERT type 3 Indicator that the structure quality may be low  
 8 ALERT type 4 Improvement, methodology, query or suggestion  
 5 ALERT type 5 Informative message, check

---

## Datablock: CCCDC\_2260010

---

Bond precision: C-C = 0.0105 A Wavelength=0.71073

Cell: a=21.302(3) b=19.101(3) c=25.487(4)  
 alpha=90 beta=90.354(5) gamma=90

Temperature: 100 K

|                        | Calculated                          | Reported                               |
|------------------------|-------------------------------------|----------------------------------------|
| Volume                 | 10370(3)                            | 10370(2)                               |
| Space group            | P 21/n                              | P 21/n                                 |
| Hall group             | -P 2yn                              | -P 2yn                                 |
| Moiety formula         | 3(C30 H24 Mn N6 O6), 6(Cl O4), 4(O) | 3(C30 H24 Mn N6 O6), 6(Cl O4), 4(H2 O) |
| Sum formula            | C90 H72 Cl6 Mn3 N18 O46             | C90 H80 Cl6 Mn3 N18 O46                |
| Mr                     | 2519.18                             | 2527.24                                |
| Dx, g cm <sup>-3</sup> | 1.614                               | 1.619                                  |
| Z                      | 4                                   | 4                                      |
| Mu (mm <sup>-1</sup> ) | 0.619                               | 0.619                                  |
| F000                   | 5132.0                              | 5164.0                                 |
| F000'                  | 5142.32                             |                                        |
| h,k,lmax               | 28,25,34                            | 28,25,34                               |
| Nref                   | 26149                               | 25615                                  |
| Tmin,Tmax              | 0.893,0.933                         | 0.601,0.746                            |
| Tmin'                  | 0.885                               |                                        |

Correction method= # Reported T Limits: Tmin=0.601 Tmax=0.746  
AbsCorr = MULTI-SCAN

Data completeness= 0.980                      Theta(max)= 28.433

R(reflections)= 0.1002( 20710)

wR2(reflections)=  
0.2710( 25615)

S = 1.096                      Npar= 1468

The following ALERTS were generated. Each ALERT has the format

**test-name\_ALERT\_alert-type\_alert-level.**

Click on the hyperlinks for more details of the test.

### Alert level B

|                   |                                                  |         |             |
|-------------------|--------------------------------------------------|---------|-------------|
| PLAT306_ALERT_2_B | Isolated Oxygen Atom (H-atoms Missing ?)         | .....   | O1W Check   |
| PLAT306_ALERT_2_B | Isolated Oxygen Atom (H-atoms Missing ?)         | .....   | O2W Check   |
| PLAT306_ALERT_2_B | Isolated Oxygen Atom (H-atoms Missing ?)         | .....   | O3W Check   |
| PLAT306_ALERT_2_B | Isolated Oxygen Atom (H-atoms Missing ?)         | .....   | O4W Check   |
| PLAT430_ALERT_2_B | Short Inter D...A Contact O3W                    | ..O11   | 2.83 Ang.   |
|                   |                                                  | x,y,z = | 1_555 Check |
| PLAT934_ALERT_3_B | Number of (Iobs-Icalc)/Sigma(W) > 10 Outliers .. |         | 4 Check     |
|                   | 12 1 8, -11 13 8, 2 3 12, 12 5 14,               |         |             |

### Alert level C

|                   |                                  |                |              |
|-------------------|----------------------------------|----------------|--------------|
| PLAT041_ALERT_1_C | Calc. and Reported SumFormula    | Strings Differ | Please Check |
|                   | Calc.: C90 H72 Cl6 Mn3 N18 O46   |                |              |
|                   | Rep.: C90 H80 Cl6 Mn3 N18 O46    |                |              |
| PLAT042_ALERT_1_C | Calc. and Reported MoietyFormula | Strings Differ | Please Check |

Calc: 3(C30 H24 Mn N6 O6), 6(Cl O4), 4(O)  
Rep.: 3(C30 H24 Mn N6 O6), 6(Cl O4), 4(H2 O)

|                   |                                                         |         |              |
|-------------------|---------------------------------------------------------|---------|--------------|
| PLAT043_ALERT_1_C | Calculated and Reported Mol. Weight Differ by ..        | 8.06    | Check        |
| PLAT068_ALERT_1_C | Reported F000 Differs from Calcd (or Missing)...        |         | Please Check |
| PLAT084_ALERT_3_C | High wR2 Value (i.e. > 0.25) .....                      | 0.27    | Report       |
| PLAT094_ALERT_2_C | Ratio of Maximum / Minimum Residual Density ....        | 2.33    | Report       |
| PLAT220_ALERT_2_C | NonSolvent Resd 3 C Ueq(max)/Ueq(min) Range             | 3.6     | Ratio        |
| PLAT244_ALERT_4_C | Low 'Solvent' Ueq as Compared to Neighbors of           |         | C15 Check    |
| PLAT260_ALERT_2_C | Large Average Ueq of Residue Including C11              | 0.131   | Check        |
| PLAT341_ALERT_3_C | Low Bond Precision on C-C Bonds .....                   | 0.01047 | Ang.         |
| PLAT430_ALERT_2_C | Short Inter D...A Contact O2W ..051 .                   | 2.87    | Ang.         |
|                   | x,y,z =                                                 | 1_555   | Check        |
| PLAT430_ALERT_2_C | Short Inter D...A Contact O3W ..031 .                   | 2.90    | Ang.         |
|                   | x,y,z =                                                 | 1_555   | Check        |
| PLAT906_ALERT_3_C | Large K Value in the Analysis of Variance .....         | 17.822  | Check        |
| PLAT906_ALERT_3_C | Large K Value in the Analysis of Variance .....         | 3.853   | Check        |
| PLAT910_ALERT_3_C | Missing # of FCF Reflection(s) Below Theta(Min).        | 8       | Note         |
|                   | 1 1 0, 2 0 0, -1 0 1, -1 1 1, 0 1 1, 1 0 1,             |         |              |
|                   | 1 1 1, 0 0 2,                                           |         |              |
| PLAT911_ALERT_3_C | Missing FCF Refl Between Thmin & STh/L= 0.600           | 275     | Report       |
|                   | 0 2 0, 1 2 0, 2 1 0, 3 5 0, 3 13 0, 8 1 0,              |         |              |
|                   | 9 8 0, 9 12 0, 10 3 0, 11 3 0, 13 4 0, 13 8 0,          |         |              |
|                   | 14 10 0, 17 4 0, 18 8 0, 19 8 0, -18 10 1, -13 8 1,     |         |              |
|                   | -12 8 1, -11 19 1, -8 1 1, -8 2 1, -7 11 1, -6 1 1,     |         |              |
|                   | -6 5 1, 11 13 1, 12 5 1, 14 3 1, 15 7 1, 20 1 1,        |         |              |
|                   | -17 10 2, -15 11 2, -14 4 2, -13 16 2, -11 7 2, -8 6 2, |         |              |
|                   | -6 3 2, -1 18 2, 1 16 2, 2 0 2, 4 2 2, 6 3 2,           |         |              |
|                   | 6 4 2, 8 2 2, 10 3 2, 12 6 2, 15 11 2, 17 6 2,          |         |              |
|                   | 17 12 2, 22 2 2, -21 6 3, -19 3 3, -19 9 3, -17 6 3,    |         |              |
|                   | -14 1 3, -12 3 3, -8 3 3, -8 9 3, -5 12 3, 5 14 3,      |         |              |
|                   | 7 7 3, 7 11 3, 8 7 3, -19 5 4, -19 7 4, -13 6 4,        |         |              |
|                   | -7 12 4, -5 10 4, -4 4 4, -2 5 4, 0 2 4, 3 11 4,        |         |              |
|                   | 4 0 4, 4 2 4, 5 8 4, 7 5 4, 9 8 4, 11 13 4,             |         |              |
|                   | 16 0 4, 21 5 4, -18 8 5, -9 4 5, -2 1 5, 0 4 5,         |         |              |
|                   | 0 6 5, 13 10 5, 20 9 5, -20 5 6, -16 0 6, -13 8 6,      |         |              |
|                   | -12 6 6, -11 5 6, -11 11 6, -9 8 6, -5 10 6, -1 12 6,   |         |              |
| PLAT971_ALERT_2_C | Check Calcd Resid. Dens. 0.75Ang From O92               | 1.68    | eA-3         |
| PLAT975_ALERT_2_C | Check Calcd Resid. Dens. 1.02Ang From O123              | 0.99    | eA-3         |
| PLAT976_ALERT_2_C | Check Calcd Resid. Dens. 0.80Ang From O122              | -0.74   | eA-3         |
| PLAT976_ALERT_2_C | Check Calcd Resid. Dens. 0.47Ang From O4W               | -0.66   | eA-3         |
| PLAT976_ALERT_2_C | Check Calcd Resid. Dens. 0.53Ang From O72               | -0.64   | eA-3         |
| PLAT977_ALERT_2_C | Check Negative Difference Density on H18                | -0.36   | eA-3         |
| PLAT977_ALERT_2_C | Check Negative Difference Density on H28                | -0.41   | eA-3         |
| PLAT977_ALERT_2_C | Check Negative Difference Density on H82                | -0.35   | eA-3         |
| PLAT977_ALERT_2_C | Check Negative Difference Density on H93                | -0.36   | eA-3         |

### Alert level G

FORMU01\_ALERT\_2\_G There is a discrepancy between the atom counts in the  
\_chemical\_formula\_sum and the formula from the \_atom\_site\* data.  
Atom count from \_chemical\_formula\_sum: C90 H80 Cl6 Mn3 N18 O46  
Atom count from the \_atom\_site data: C90 H72 Cl6 Mn3 N18 O46

CELLZ01\_ALERT\_1\_G Difference between formula and atom\_site contents detected.

CELLZ01\_ALERT\_1\_G WARNING: H atoms missing from atom site list. Is this intentional?  
From the CIF: \_cell\_formula\_units\_Z 4  
From the CIF: \_chemical\_formula\_sum C90 H80 Cl6 Mn3 N18 O46  
TEST: Compare cell contents of formula and atom\_site data

|                   | atom                                             | Z*formula            | cif sites | diff      |               |         |       |  |  |  |
|-------------------|--------------------------------------------------|----------------------|-----------|-----------|---------------|---------|-------|--|--|--|
|                   | C                                                | 360.00               | 360.00    | 0.00      |               |         |       |  |  |  |
|                   | H                                                | 320.00               | 288.00    | 32.00     |               |         |       |  |  |  |
|                   | Cl                                               | 24.00                | 24.00     | 0.00      |               |         |       |  |  |  |
|                   | Mn                                               | 12.00                | 12.00     | 0.00      |               |         |       |  |  |  |
|                   | N                                                | 72.00                | 72.00     | 0.00      |               |         |       |  |  |  |
|                   | O                                                | 184.00               | 184.00    | 0.00      |               |         |       |  |  |  |
| PLAT083_ALERT_2_G | SHELXL Second Parameter in WGHT                  | Unusually Large      | 121.50    | Why ?     |               |         |       |  |  |  |
| PLAT232_ALERT_2_G | Hirshfeld Test Diff (M-X)                        | Mn3 --O72 .          | 5.3 s.u.  |           |               |         |       |  |  |  |
| PLAT244_ALERT_4_G | Low 'Solvent' Ueq as Compared to Neighbors of    |                      | Cl1 Check |           |               |         |       |  |  |  |
| PLAT244_ALERT_4_G | Low 'Solvent' Ueq as Compared to Neighbors of    |                      | Cl2 Check |           |               |         |       |  |  |  |
| PLAT244_ALERT_4_G | Low 'Solvent' Ueq as Compared to Neighbors of    |                      | Cl3 Check |           |               |         |       |  |  |  |
| PLAT244_ALERT_4_G | Low 'Solvent' Ueq as Compared to Neighbors of    |                      | Cl4 Check |           |               |         |       |  |  |  |
| PLAT244_ALERT_4_G | Low 'Solvent' Ueq as Compared to Neighbors of    |                      | Cl6 Check |           |               |         |       |  |  |  |
| PLAT432_ALERT_2_G | Short Inter X...Y Contact O112 ..C910 .          | 2.99 Ang.            |           |           | x,y,z =       | 1_555   | Check |  |  |  |
| PLAT432_ALERT_2_G | Short Inter X...Y Contact C22 ..C58 .            | 3.20 Ang.            |           |           | 1-x,1-y,1-z = | 3_666   | Check |  |  |  |
| PLAT790_ALERT_4_G | Centre of Gravity not Within Unit Cell: Resd. #  | 4 Note               |           |           |               |         |       |  |  |  |
|                   | Cl O4                                            |                      |           |           |               |         |       |  |  |  |
| PLAT790_ALERT_4_G | Centre of Gravity not Within Unit Cell: Resd. #  | 5 Note               |           |           |               |         |       |  |  |  |
|                   | Cl O4                                            |                      |           |           |               |         |       |  |  |  |
| PLAT794_ALERT_5_G | Tentative Bond Valency for Mn1 (II) .            | 2.29 Info            |           |           |               |         |       |  |  |  |
| PLAT794_ALERT_5_G | Tentative Bond Valency for Mn2 (II) .            | 2.30 Info            |           |           |               |         |       |  |  |  |
| PLAT794_ALERT_5_G | Tentative Bond Valency for Mn3 (II) .            | 2.37 Info            |           |           |               |         |       |  |  |  |
| PLAT912_ALERT_4_G | Missing # of FCF Reflections Above STh/L= 0.600  | 248 Note             |           |           |               |         |       |  |  |  |
| PLAT933_ALERT_2_G | Number of HKL-OMIT Records in Embedded .res File | 20 Note              |           |           |               |         |       |  |  |  |
|                   | 0 2 0,                                           | 2 1 0,               | -7 13 8,  | -6 1 1,   | 0 2 8,        | 0 2 4,  |       |  |  |  |
|                   | 8 2 2,                                           | 7 15 10,             | 10 3 0,   | -11 11 6, | -16 5 10,     | -4 4 4, |       |  |  |  |
|                   | -6 1 15,                                         | 6 3 2,               | 9 8 0,    | 14 4 14,  | 7 11 8,       | 8 7 3,  |       |  |  |  |
|                   | -8 1 1,                                          | -13 8 6,             |           |           |               |         |       |  |  |  |
| PLAT965_ALERT_2_G | The SHELXL WEIGHT Optimisation has not Converged | Please Check         |           |           |               |         |       |  |  |  |
| PLAT969_ALERT_5_G | The 'Henn et al.' R-Factor-gap value .....       | 4.88 Note            |           |           |               |         |       |  |  |  |
|                   | Predicted wR2: Based on SigI**2                  | 5.55 or SHELX Weight | 25.45     |           |               |         |       |  |  |  |
| PLAT978 ALERT 2 G | Number C-C Bonds with Positive Residual Density. | 0 Info               |           |           |               |         |       |  |  |  |

Please find below a validation response form (VRF) that can be filled in and pasted into your CIF.

```

# start Validation Reply Form
_vrf_PLAT214__CCDC_2260009
;
PROBLEM: Atom O162          (Anion/Solvent) ADP max/min Ratio          5.2 prolat
RESPONSE: ...
;
_vrf_PLAT306__CCDC_2260009
;
PROBLEM: Isolated Oxygen Atom (H-atoms Missing ?) .....          04W Check
RESPONSE: ...
;
_vrf_PLAT041__CCDC_2260009
;
PROBLEM: Calc. and Reported SumFormula      Strings      Differ      Please Check
RESPONSE: ...
;
_vrf_PLAT042__CCDC_2260009
;
PROBLEM: Calc. and Reported MoietyFormula Strings      Differ      Please Check
RESPONSE: ...
;
_vrf_PLAT068__CCDC_2260009
;
PROBLEM: Reported F000 Differs from Calcd (or Missing)...      Please Check
RESPONSE: ...
;
_vrf_PLAT244__CCDC_2260009
;
PROBLEM: Low      'Solvent' Ueq as Compared to Neighbors of      C12 Check
RESPONSE: ...
;
_vrf_PLAT260__CCDC_2260009
;
PROBLEM: Large Average Ueq of Residue Including      C16      0.119 Check
RESPONSE: ...
;
_vrf_PLAT906__CCDC_2260009
;
PROBLEM: Large K Value in the Analysis of Variance .....      3.021 Check
RESPONSE: ...
;
_vrf_PLAT910__CCDC_2260009
;
PROBLEM: Missing # of FCF Reflection(s) Below Theta(Min).      7 Note
RESPONSE: ...
;
_vrf_PLAT911__CCDC_2260009
;
PROBLEM: Missing FCF Refl Between Thmin & STh/L=      0.600      22 Report
RESPONSE: ...
;
_vrf_PLAT934__CCDC_2260009
;
PROBLEM: Number of (Iobs-Icalc)/Sigma(W) > 10 Outliers ..      1 Check
RESPONSE: ...
;
_vrf_PLAT971__CCDC_2260009

```

```

;
PROBLEM: Check Calcd Resid. Dens.  2.75Ang From O164          1.54 eA-3
RESPONSE: ...
;
_vrf_PLAT975__CCDC_2260009
;
PROBLEM: Check Calcd Resid. Dens.  1.03Ang From O4W          .      0.54 eA-3
RESPONSE: ...
;
_vrf_PLAT976__CCDC_2260009
;
PROBLEM: Check Calcd Resid. Dens.  0.99Ang From O111          .      -0.69 eA-3
RESPONSE: ...
;
_vrf_PLAT306__CCDC_2260010
;
PROBLEM: Isolated Oxygen Atom (H-atoms Missing ?) .....      O1W Check
RESPONSE: ...
;
_vrf_PLAT430__CCDC_2260010
;
PROBLEM: Short Inter D...A Contact  O3W          ..O11          .      2.83 Ang.
RESPONSE: ...
;
_vrf_PLAT934__CCDC_2260010
;
PROBLEM: Number of (Iobs-Icalc)/Sigma(W) > 10 Outliers ..      4 Check
RESPONSE: ...
;
_vrf_PLAT041__CCDC_2260010
;
PROBLEM: Calc. and Reported SumFormula      Strings      Differ      Please Check
RESPONSE: ...
;
_vrf_PLAT042__CCDC_2260010
;
PROBLEM: Calc. and Reported MoietyFormula Strings      Differ      Please Check
RESPONSE: ...
;
_vrf_PLAT043__CCDC_2260010
;
PROBLEM: Calculated and Reported Mol. Weight Differ by ..      8.06 Check
RESPONSE: ...
;
_vrf_PLAT068__CCDC_2260010
;
PROBLEM: Reported F000 Differs from Calcd (or Missing)...      Please Check
RESPONSE: ...
;
_vrf_PLAT084__CCDC_2260010
;
PROBLEM: High wR2 Value (i.e. > 0.25) .....      0.27 Report
RESPONSE: ...
;
_vrf_PLAT094__CCDC_2260010
;
PROBLEM: Ratio of Maximum / Minimum Residual Density ....      2.33 Report

```



```

RESPONSE: ...
;
_vrf_PLAT220_CCCDC_2260010
;
PROBLEM: NonSolvent   Resd 3   C   Ueq(max)/Ueq(min) Range           3.6 Ratio
RESPONSE: ...
;
_vrf_PLAT244_CCCDC_2260010
;
PROBLEM: Low        'Solvent' Ueq as Compared to Neighbors of       C15 Check
RESPONSE: ...
;
_vrf_PLAT260_CCCDC_2260010
;
PROBLEM: Large Average Ueq of Residue Including           C11       0.131 Check
RESPONSE: ...
;
_vrf_PLAT341_CCCDC_2260010
;
PROBLEM: Low Bond Precision on   C-C Bonds .....           0.01047 Ang.
RESPONSE: ...
;
_vrf_PLAT906_CCCDC_2260010
;
PROBLEM: Large K Value in the Analysis of Variance .....   17.822 Check
RESPONSE: ...
;
_vrf_PLAT910_CCCDC_2260010
;
PROBLEM: Missing # of FCF Reflection(s) Below Theta(Min).       8 Note
RESPONSE: ...
;
_vrf_PLAT911_CCCDC_2260010
;
PROBLEM: Missing FCF Refl Between Thmin & STh/L=           0.600       275 Report
RESPONSE: ...
;
_vrf_PLAT971_CCCDC_2260010
;
PROBLEM: Check Calcd Resid. Dens.   0.75Ang From O92           1.68 eA-3
RESPONSE: ...
;
_vrf_PLAT975_CCCDC_2260010
;
PROBLEM: Check Calcd Resid. Dens.   1.02Ang From O123           .           0.99 eA-3
RESPONSE: ...
;
_vrf_PLAT976_CCCDC_2260010
;
PROBLEM: Check Calcd Resid. Dens.   0.80Ang From O122           .           -0.74 eA-3
RESPONSE: ...
;
_vrf_PLAT977_CCCDC_2260010
;

```

PROBLEM: Check Negative Difference Density on H18 . -0.36 eA-3  
RESPONSE: ...  
;  
# end Validation Reply Form

---

It is advisable to attempt to resolve as many as possible of the alerts in all categories. Often the minor alerts point to easily fixed oversights, errors and omissions in your CIF or refinement strategy, so attention to these fine details can be worthwhile. In order to resolve some of the more serious problems it may be necessary to carry out additional measurements or structure refinements. However, the purpose of your study may justify the reported deviations and the more serious of these should normally be commented upon in the discussion or experimental section of a paper or in the "special\_details" fields of the CIF. checkCIF was carefully designed to identify outliers and unusual parameters, but every test has its limitations and alerts that are not important in a particular case may appear. Conversely, the absence of alerts does not guarantee there are no aspects of the results needing attention. It is up to the individual to critically assess their own results and, if necessary, seek expert advice.

### **Publication of your CIF in IUCr journals**

A basic structural check has been run on your CIF. These basic checks will be run on all CIFs submitted for publication in IUCr journals (*Acta Crystallographica*, *Journal of Applied Crystallography*, *Journal of Synchrotron Radiation*); however, if you intend to submit to *Acta Crystallographica Section C* or *E* or *IUCrData*, you should make sure that full publication checks are run on the final version of your CIF prior to submission.

### **Publication of your CIF in other journals**

Please refer to the *Notes for Authors* of the relevant journal for any special instructions relating to CIF submission.

---

**PLATON version of 06/01/2024; check.def file version of 05/01/2024**

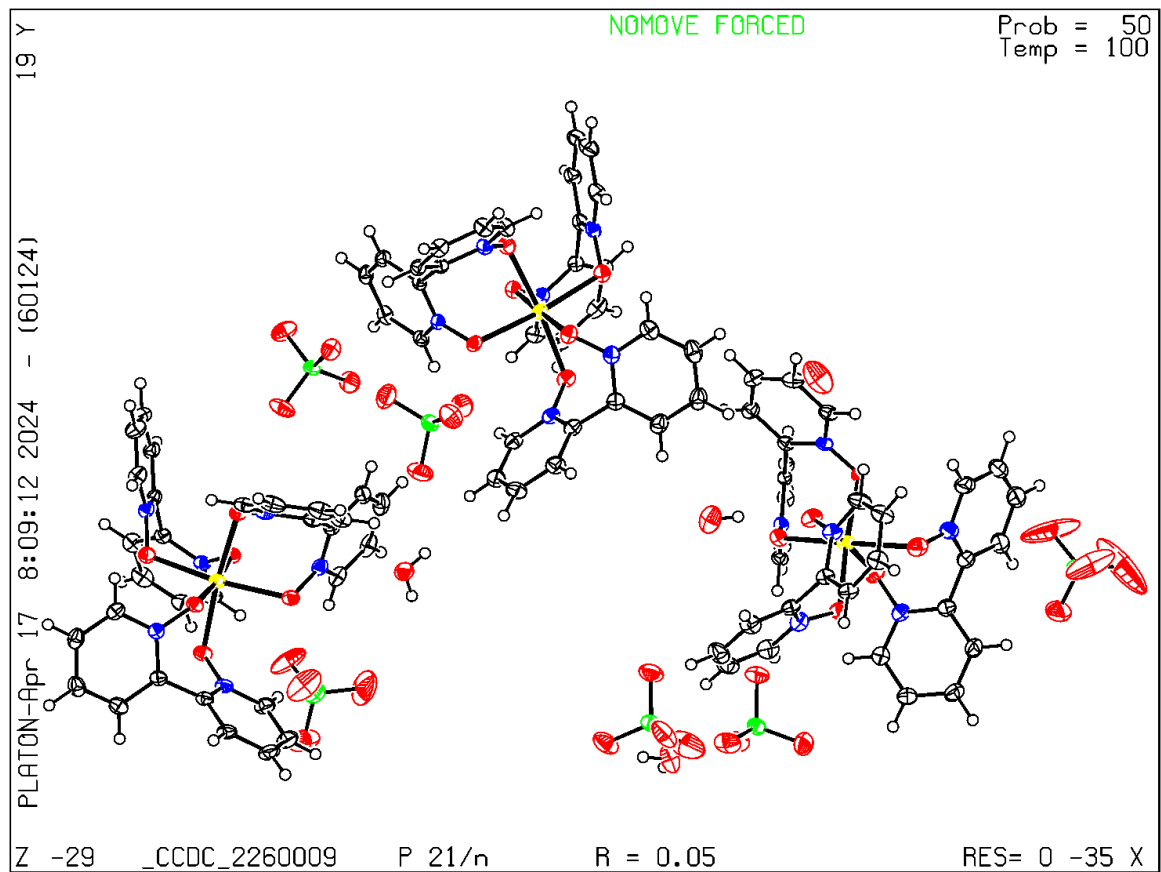

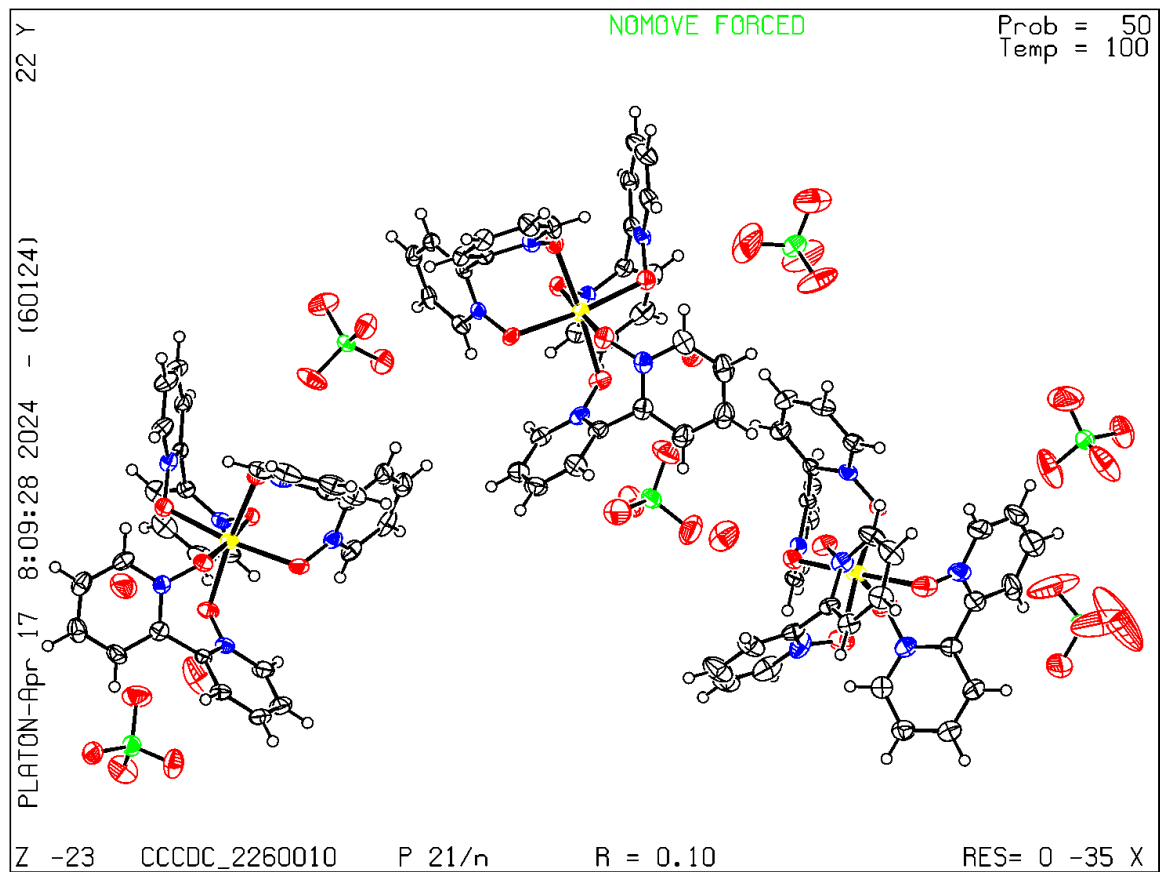

Supplement: s1 [file s1]
